# Supplementary material for: Optimized thermal design for excellent wearable thermoelectric generator
Source: Royal Society of Chemistry journal article supplement (doi:10.1039/d2ta06966k), 2022-01-01
Supplement: d2ta06966k1.pdf [file d2ta06966k1.pdf]

**Supporting Information for:**

**Optimized thermal design for excellent wearable  
thermoelectric generator**

Kai Hu<sup>1</sup>, Dongwang Yang<sup>1\*</sup>, Yueyue Hui<sup>2</sup>, Huazhang Zhang<sup>2</sup>, Rongguo Song<sup>2</sup>, Yutian Liu<sup>1</sup>,  
Jiang Wang<sup>1</sup>, Pin Wen<sup>3</sup>, Daping He<sup>2</sup>, Yonggao Yan<sup>1\*</sup>, and Xinfeng Tang<sup>1\*</sup>

*<sup>1</sup>State Key Laboratory of Advanced Technology for Materials Synthesis and  
Processing, Wuhan University of Technology, Wuhan 430070, China*

*<sup>2</sup>Hubei Engineering Research Center of RF-Microwave Technology and Application,  
School of Science, Wuhan University of Technology, Wuhan 430070, China*

*<sup>3</sup>Hubei Key Laboratory of Theory and Application of Advanced Materials Mechanics,  
School of Science, Wuhan University of Technology, Wuhan 430070, China*

\* Correspondence and requests for materials should be addressed to Dongwang Yang  
(ydongwang@whut.edu.cn), Yonggao Yan (yanyonggao@whut.edu.cn) or to Xinfeng  
Tang (tangxf@whut.edu.cn).

## 1. Model building for finite element simulation

When a wearable thermoelectric generator (w-TEG) is worn on the wrist, the heat of human body flows from the blood core and passes through skin, bottom substrate, TE legs, top substrate and ambient environment in turn (Figure S1A). In order to ensure the accuracy of the simulation, the epidermis, dermis, and fat layer are considered in the skin model, as shown in Figure S1B. The corresponding parameter settings of the model for finite element simulation are listed in Table S1. Because the human skin surface is not absolutely flat, there is always a gap between the skin and the bottom substrate of w-TEG, which creates a relatively large contact thermal resistance, i.e.,  $R_{\text{contact}}$ . It could be expressed as following:<sup>1-3</sup>

$$R_{\text{contact}} = \frac{(\sigma/m)}{1.25 \cdot A \cdot \kappa_s \cdot (P/H_C)^{0.95}} \quad (1)$$

where  $\sigma$  is the root mean square (RMS) of surface roughness and  $m$  is the average surface asperity slope, and  $A$  is the macroscopic contact area and  $\kappa_s$  is the harmonic mean thermal conductivity.  $P$  is the applied pressure and  $H_C$  is the microhardness of the substrate. The equivalent roughness ( $\sigma$ ), surface slope ( $m$ ) and thermal conductivity ( $\kappa_s$ ) can be calculated from

$$\sigma = \sqrt{\sigma_{\text{skin}}^2 + \sigma_{\text{sub}}^2} \quad (2)$$

$$m = \sqrt{m_{\text{skin}}^2 + m_{\text{sub}}^2} \quad (3)$$

$$\kappa_s = \frac{2 \cdot \kappa_{\text{skin}} \cdot \kappa_{\text{sub}}}{\kappa_{\text{skin}} + \kappa_{\text{sub}}} \quad (4)$$

where  $\sigma_1$ ,  $m_{\text{skin}}$  and  $\kappa_{\text{skin}}$  are the equivalent roughness, surface slope and thermal conductivity of skin, respectively.  $\sigma_{\text{sub}}$ ,  $m_{\text{sub}}$  and  $\kappa_{\text{sub}}$  represent the equivalent roughness, surface slope and thermal conductivity of substrate, respectively.<sup>4,5</sup> The surface slope ( $m$ ) can be estimated as a value depending on the surface roughness  $\sigma$

$$m = 0.076 \cdot (\sigma \times 10^6)^{0.52} \quad (5)$$

## 2. Thermal Boundary Condition Settings

The widely used Pennes bio-heat equation describing heat transfer in the skin tissues is expressed as

$$Q = \rho_b \cdot C_{p,b} \cdot \omega_b (T_b - T) + Q_{met} \quad (6)$$

where  $\rho_b$  is the density of blood and  $C_{p,b}$  is the Specific heat of blood, and  $\omega_b$  is the blood perfusion rate and  $T_b$  is the arterial blood temperature.  $Q_{met}$  describes heat generation from metabolism. In addition, effects of blood transport are generally thought to exist only in the dermis layer and the epidermis layer could ignore the biological heat as a thermal resistance layer.<sup>1-3,6-8</sup>

According to Fourier's law, the heat transfer between w-TEG and the environment can be expressed as follow:

$$Q = h(T_{ambient} - T) \quad (7)$$

where  $h$  is the heat transfer coefficient and  $T_{ambient}$  is the ambient temperature. The heat transfer coefficients of different positions of different materials of w-TEG are divided into three categories: the top surface, the bottom surface and the side surface of the horizontal plane, which are discussed separately. The heat transfer coefficient ( $h_{top}$ ) at the top surface of the substrate and electrode can be calculated as:

$$h_{top} = \begin{cases} \frac{\kappa}{L} \cdot 0.54 Ra_L^{\frac{1}{4}} & \text{if } T > T_{ambient} \text{ and } 10^4 \leq Ra_L \leq 10^7 \\ \frac{\kappa}{L} \cdot 0.15 Ra_L^{\frac{1}{3}} & \text{if } T < T_{ambient} \text{ and } 10^7 \leq Ra_L \leq 10^{11} \\ \frac{\kappa}{L} \cdot 0.27 Ra_L^{\frac{1}{4}} & \text{if } T \leq T_{ambient} \text{ and } 10^5 \leq Ra_L \leq 10^{10} \end{cases} \quad (8)$$

Where  $\kappa$  is thermal conductivity of heat transfer medium (air),  $L$  is the characteristic length (defined as area / perimeter) and  $Ra_L$  is the rayleigh number .

The heat transfer coefficient ( $h_{bot}$ ) at the bottom surface of the w-TEG can be calculated as:

$$h_{bot} = \begin{cases} \frac{\kappa}{L} \cdot 0.54 Ra_L^{\frac{1}{4}} & \text{if } T \leq T_{ambient} \text{ and } 10^4 \leq Ra_L \leq 10^7 \\ \frac{\kappa}{L} \cdot 0.15 Ra_L^{\frac{1}{3}} & \text{if } T \leq T_{ambient} \text{ and } 10^7 \leq Ra_L \leq 10^{11} \\ \frac{\kappa}{L} \cdot 0.27 Ra_L^{\frac{1}{4}} & \text{if } T > T_{ambient} \text{ and } 10^5 \leq Ra_L \leq 10^{10} \end{cases} \quad (9)$$

Where  $\kappa$  is thermal conductivity of heat transfer medium (air),  $L$  is the characteristic length (defined as area / perimeter) and  $Ra_L$  is the rayleigh number. The heat transfer coefficient ( $h_{bot}$ ) at the side surface of the w-TEG can be calculated as:

$$h_{side} = \begin{cases} \frac{\kappa}{H} \left( 0.68 + \frac{0.67 Ra_L^{1/4}}{\left( 1 + \left( \frac{0.492}{\mu C_p} \right)^{4/9} \right)} \right) & \text{if } Ra_L \leq 10^9 \\ \frac{\kappa}{H} \left( 0.825 + \frac{0.387 Ra_L^{1/6}}{\left( 1 + \left( \frac{0.492}{\mu C_p} \right)^{8/27} \right)} \right) & \text{if } Ra_L > 10^9 \end{cases} \quad (10)$$

Where  $\kappa$ ,  $\mu$ ,  $C_p$  are thermal conductivity of heat transfer medium (air), dynamic viscosity and heat capacity of air at the qualitative temperature ( $T_q$ ) respectively. The qualitative temperature is defined as  $(T_{side} + T_{ambient})/2$ , where  $T_{side}$  is the temperature of the side surface of the w-TEG.  $Ra$  represents the Rayleigh number defined by  $T_q$  and the characteristic length  $H$  (the side height of the cube).

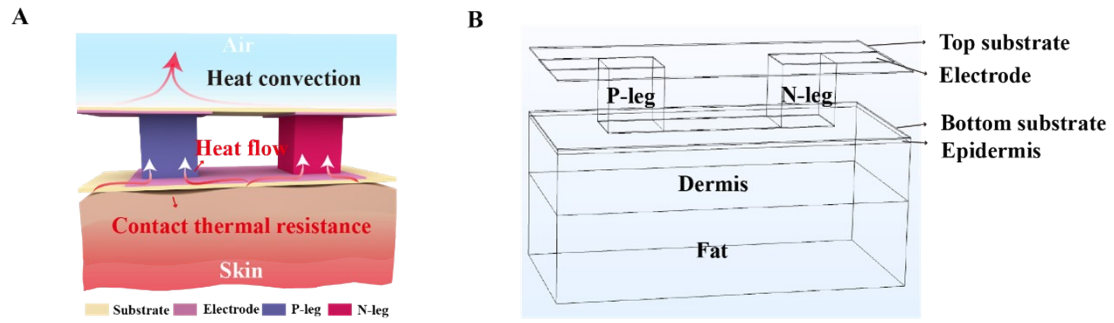

Figure S1. (A) Schematic diagram of the simulation model, (B) Actual simulation model for finite element analysis (FEA) by COMSOL

**Table S1** Parameter settings of the model for finite element simulation

| Material         | Height (mm) | Parameter                                                        | Value      |
|------------------|-------------|------------------------------------------------------------------|------------|
| TE legs          | 1.6         | TE properties                                                    | In Fig. S7 |
| Copper electrode | 0.02        | Resistivity ( $S\ m^{-1}$ )                                      | 7000000    |
|                  |             | Thermal conductivity ( $W\ m^{-1}\ K^{-1}$ )                     | 400        |
| Substrate        | Variable    | Thermal conductivity ( $W\ m^{-1}\ K^{-1}$ )                     | Variable   |
| Epidermis        | 0.1         | Thermal conductivity ( $W\ m^{-1}\ K^{-1}$ )                     | 0.235      |
|                  |             | Surface roughness ( $\mu m$ )                                    | 21.69      |
|                  |             | Surface asperity slope (rad)                                     | 0.3        |
|                  |             | Microhardness (MPa)                                              | 0.1225     |
| Dermis           | 1.5         | Contact pressure (kPa)                                           | 0.5        |
|                  |             | Thermal conductivity ( $W\ m^{-1}\ K^{-1}$ )                     | 0.445      |
|                  |             | Blood perfusion rate ( $s^{-1}$ )                                | 0.03       |
| Fat              | 4.4         | Density $\times$ specific heat of blood ( $10^6\ J\ m^{-3}\ K$ ) | 4.218      |
|                  |             | Body core temperature $T_{core}$ (K)                             | 310        |
|                  |             | Thermal conductivity ( $W\ m^{-1}\ K^{-1}$ )                     | 0.185      |
|                  |             | Metabolic heat generation ( $W\ m^{-3}$ )                        | 368        |

A. FF = 10 %

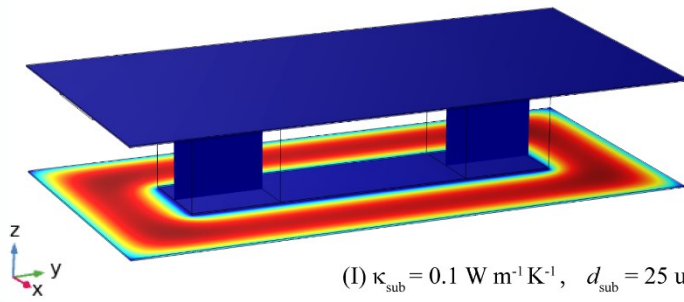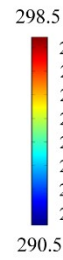

$$\Delta T_{\text{sub, top, in plane}} = 0.18 \text{ K}$$

$$\Delta T_{\text{TE legs}} = 0.26 \text{ K}$$

$$\Delta T_{\text{sub, bot, in plane}} = 8.03 \text{ K}$$

$$(I) \kappa_{\text{sub}} = 0.1 \text{ W m}^{-1} \text{ K}^{-1}, \quad d_{\text{sub}} = 25 \text{ um}$$

B. FF = 20 %

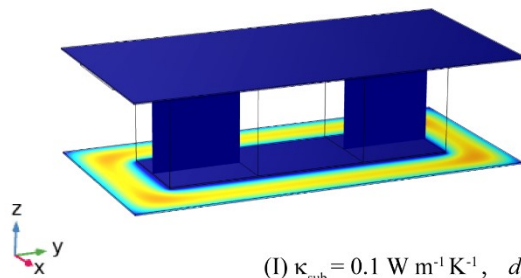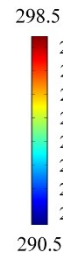

$$\Delta T_{\text{sub, top, in plane}} = 0.14 \text{ K}$$

$$\Delta T_{\text{TE legs}} = 0.20 \text{ K}$$

$$\Delta T_{\text{sub, bot, in plane}} = 5.82 \text{ K}$$

$$(I) \kappa_{\text{sub}} = 0.1 \text{ W m}^{-1} \text{ K}^{-1}, \quad d_{\text{sub}} = 25 \text{ um}$$

C. FF = 30 %

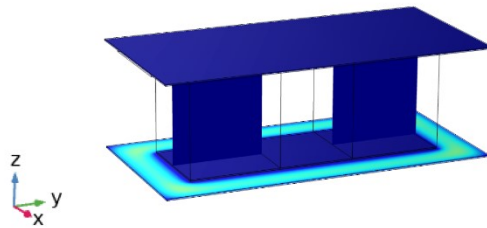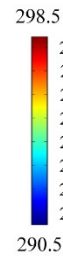

$$\Delta T_{\text{sub, top, in plane}} = 0.11 \text{ K}$$

$$\Delta T_{\text{TE legs}} = 0.16 \text{ K}$$

$$\Delta T_{\text{sub, bot, in plane}} = 3.96 \text{ K}$$

$$(I) \kappa_{\text{sub}} = 0.1 \text{ W m}^{-1} \text{ K}^{-1}, \quad d_{\text{sub}} = 25 \text{ um}$$

D. FF = 40 %

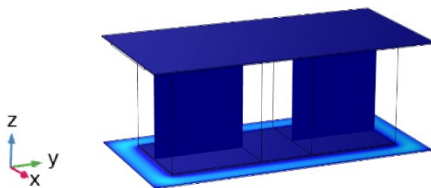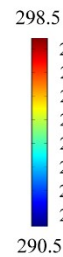

$$\Delta T_{\text{sub, top, in plane}} = 0.09 \text{ K}$$

$$\Delta T_{\text{TE legs}} = 0.13 \text{ K}$$

$$\Delta T_{\text{sub, bot, in plane}} = 2.61 \text{ K}$$

$$(I) \kappa_{\text{sub}} = 0.1 \text{ W m}^{-1} \text{ K}^{-1}, \quad d_{\text{sub}} = 25 \text{ um}$$

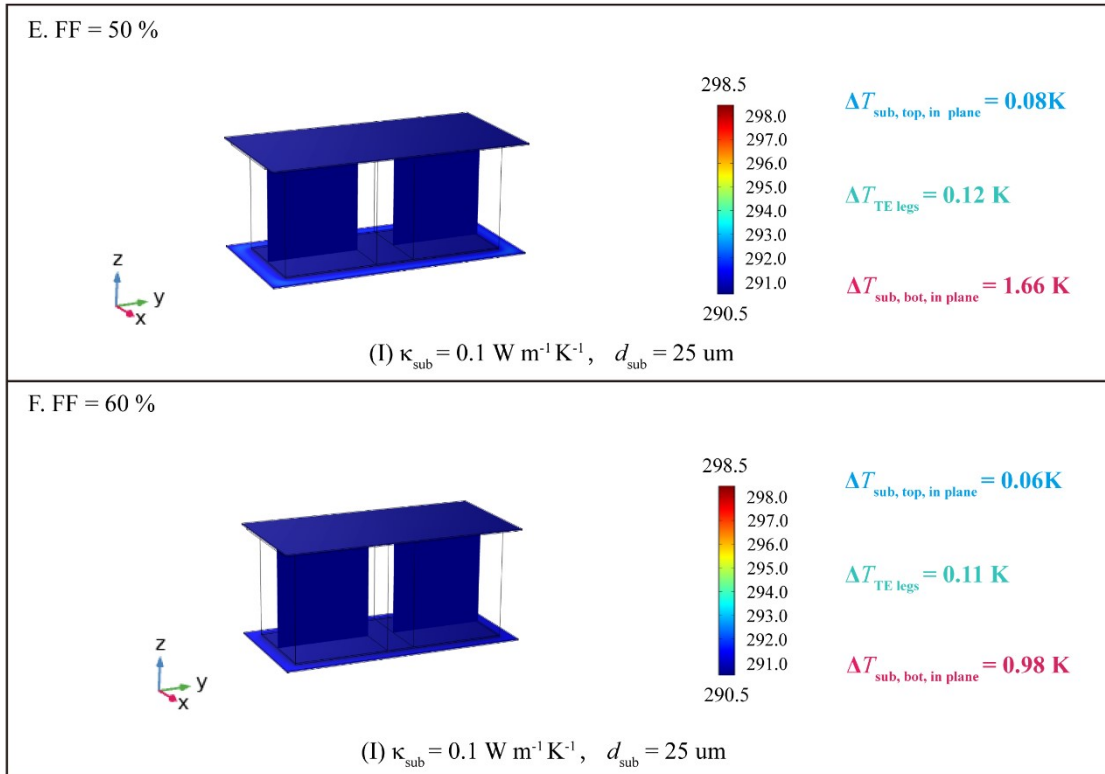

**Figure S2.** Temperature distribution of bottom substrate, thermoelectric legs and top substrate in the w-TEG with different fill factors (FFs): (A) FF = 10 %, (B) FF = 20 %, (C) FF = 30 %, (D) FF = 40%, (E) FF = 50%, (F) FF = 60%. Note: the thermal conductivity of the substrate ( $\kappa_{\text{sub}}$ ) is  $0.1 \text{ W m}^{-1} \text{ K}^{-1}$ , and the thickness of substrate ( $d_{\text{sub}}$ ) is  $25 \text{ }\mu\text{m}$ .

A. FF = 10 %

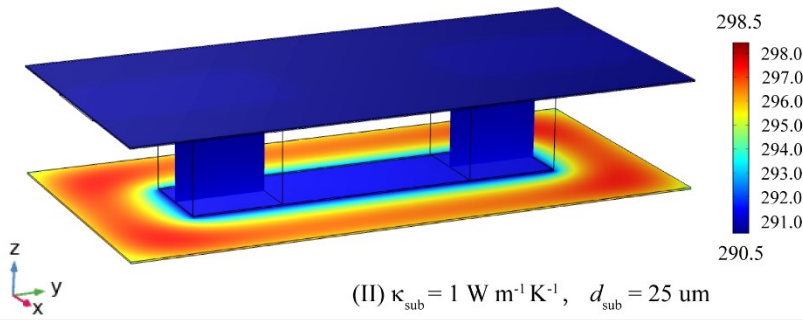

$$\Delta T_{\text{sub, top, in plane}} = 0.39 \text{ K}$$

$$\Delta T_{\text{TE legs}} = 0.74 \text{ K}$$

$$\Delta T_{\text{sub, bot, in plane}} = 6.15 \text{ K}$$

B. FF = 20 %

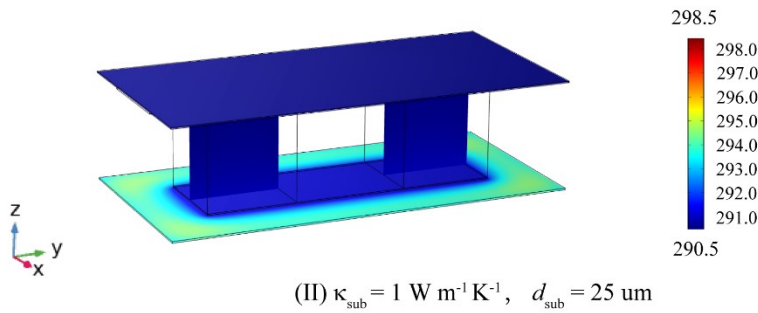

$$\Delta T_{\text{sub, top, in plane}} = 0.22 \text{ K}$$

$$\Delta T_{\text{TE legs}} = 0.50 \text{ K}$$

$$\Delta T_{\text{sub, bot, in plane}} = 3.62 \text{ K}$$

C. FF = 30 %

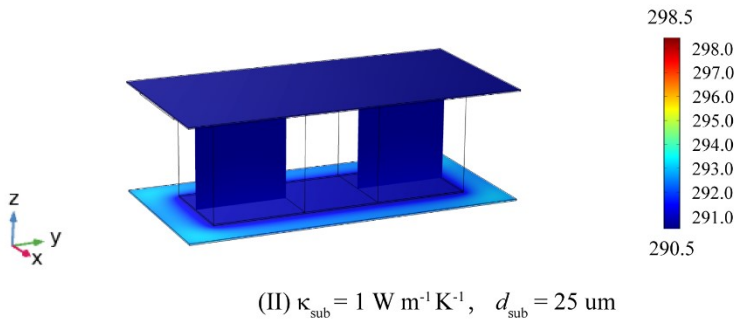

$$\Delta T_{\text{sub, top, in plane}} = 0.14 \text{ K}$$

$$\Delta T_{\text{TE legs}} = 0.38 \text{ K}$$

$$\Delta T_{\text{sub, bot, in plane}} = 2.20 \text{ K}$$

D. FF = 40 %

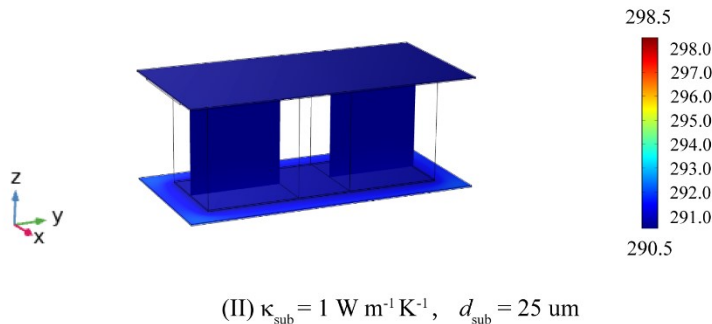

$$\Delta T_{\text{sub, top, in plane}} = 0.09 \text{ K}$$

$$\Delta T_{\text{TE legs}} = 0.32 \text{ K}$$

$$\Delta T_{\text{sub, bot, in plane}} = 1.33 \text{ K}$$



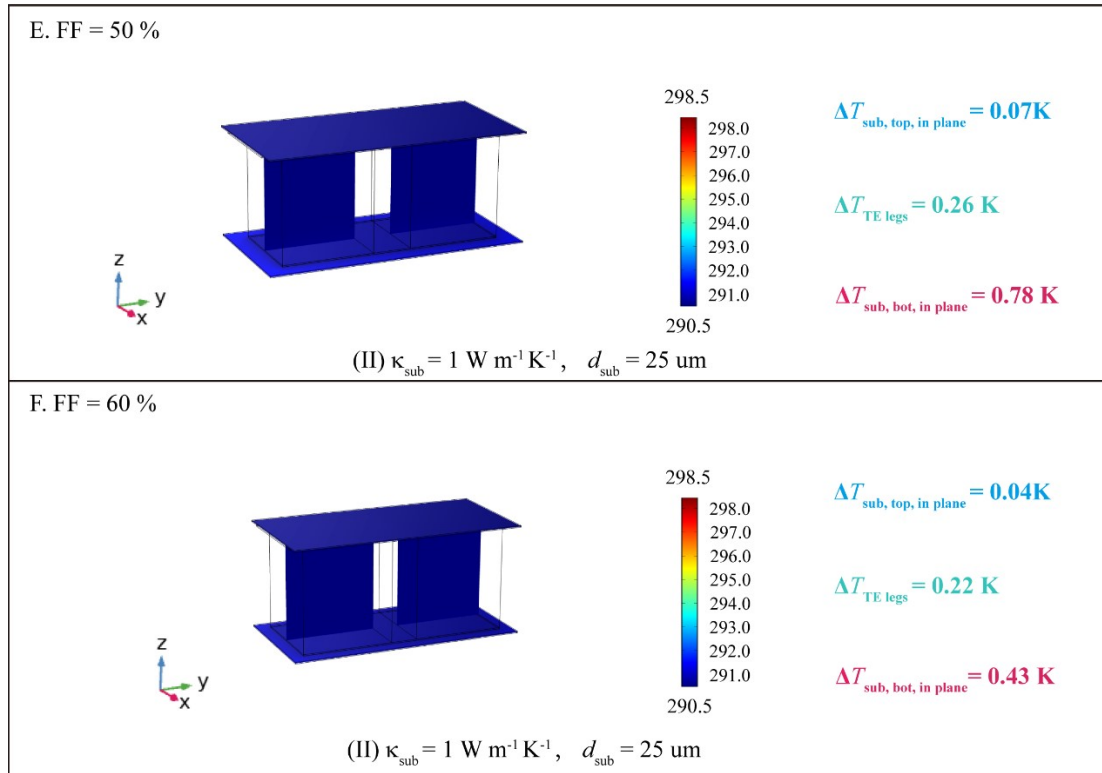

**Figure S3.** Temperature distribution of bottom substrate, thermoelectric legs and top substrate in the w-TEG with different fill factors (FFs): (A) FF = 10 %, (B) FF = 20 %, (C) FF = 30 %, (D) FF = 40%, (E) FF = 50%, (F) FF = 60%. Note: the thermal conductivity of the substrate ( $\kappa_{\text{sub}}$ ) is  $1 \text{ W m}^{-1} \text{ K}^{-1}$ , and the thickness of substrate ( $d_{\text{sub}}$ ) is  $25 \text{ }\mu\text{m}$ .

A. FF = 10 %

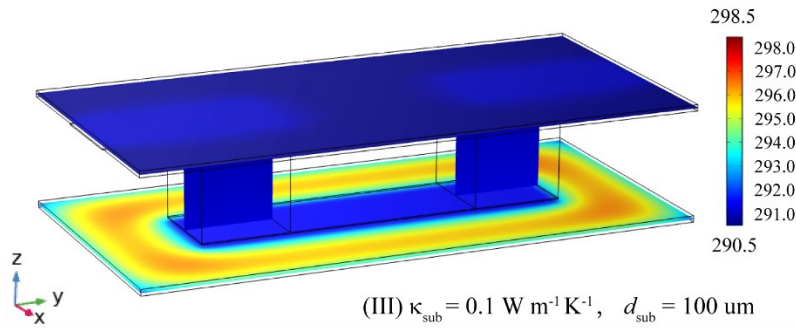

$$\Delta T_{\text{sub, top, in plane}} = 0.80 \text{ K}$$

$$\Delta T_{\text{TE legs}} = 0.36 \text{ K}$$

$$\Delta T_{\text{sub, bot, in plane}} = 5.01 \text{ K}$$

B. FF = 20 %

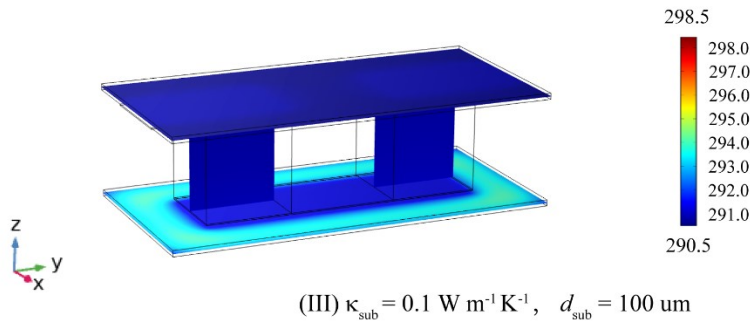

$$\Delta T_{\text{sub, top, in plane}} = 0.52 \text{ K}$$

$$\Delta T_{\text{TE legs}} = 0.25 \text{ K}$$

$$\Delta T_{\text{sub, bot, in plane}} = 2.94 \text{ K}$$

C. FF = 30 %

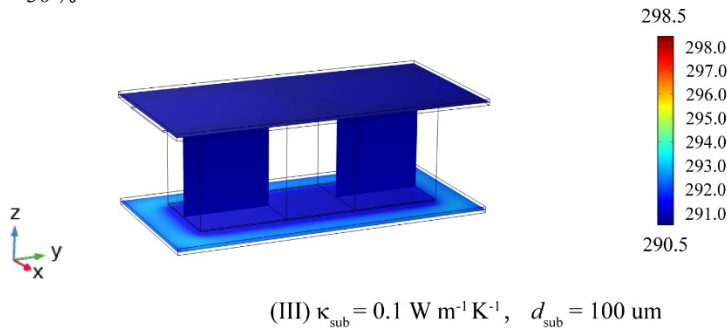

$$\Delta T_{\text{sub, top, in plane}} = 0.39 \text{ K}$$

$$\Delta T_{\text{TE legs}} = 0.19 \text{ K}$$

$$\Delta T_{\text{sub, bot, in plane}} = 1.78 \text{ K}$$

D. FF = 40 %

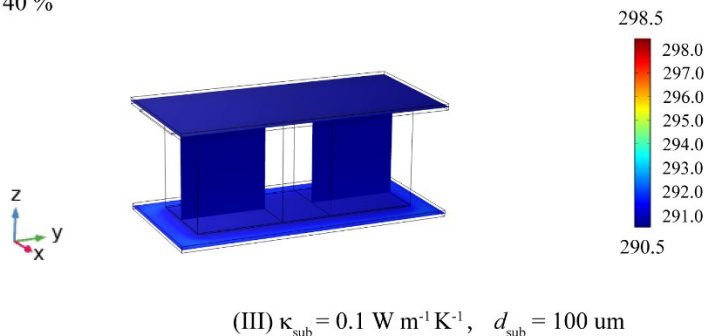

$$\Delta T_{\text{sub, top, in plane}} = 0.29 \text{ K}$$

$$\Delta T_{\text{TE legs}} = 0.16 \text{ K}$$

$$\Delta T_{\text{sub, bot, in plane}} = 1.09 \text{ K}$$

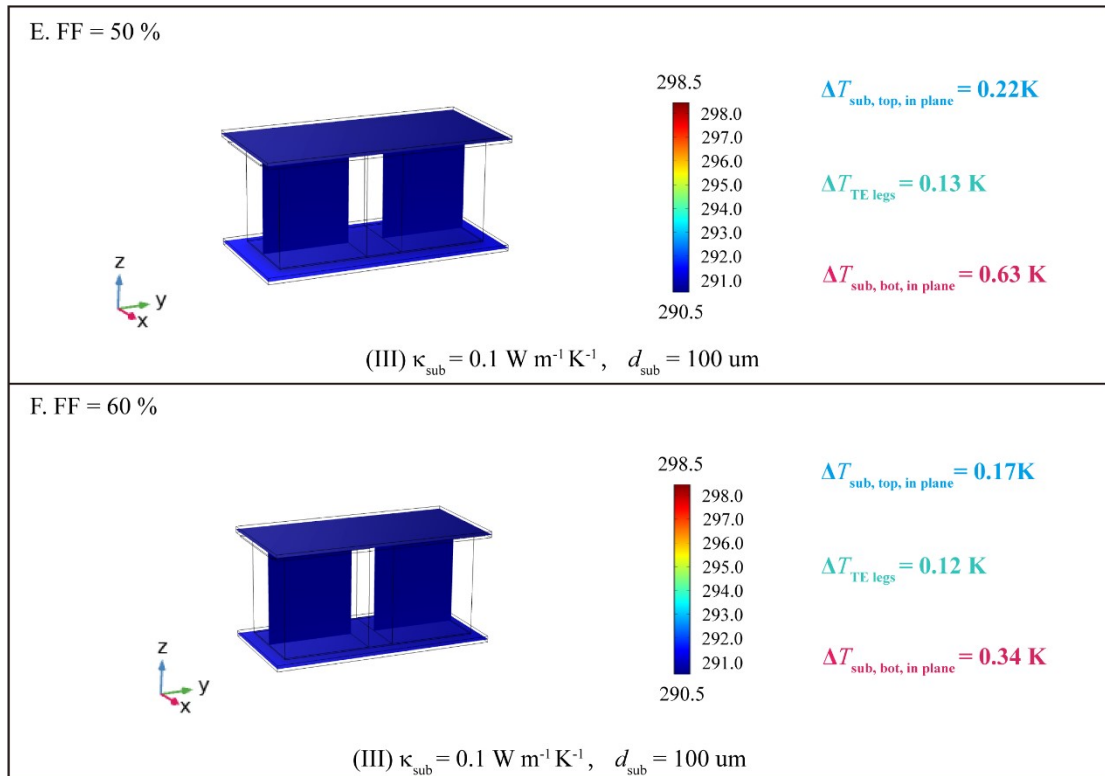

**Figure S4.** Temperature distribution of bottom substrate, thermoelectric legs and top substrate in the w-TEG with different fill factors (FFs): (A) FF = 10 %, (B) FF = 20 %, (C) FF = 30 %, (D) FF = 40%, (E) FF = 50%, (F) FF = 60%. Note: the thermal conductivity of the substrate ( $\kappa_{\text{sub}}$ ) is  $0.1 \text{ W m}^{-1} \text{ K}^{-1}$ , and the thickness of substrate ( $d_{\text{sub}}$ ) is  $100 \text{ μm}$ .

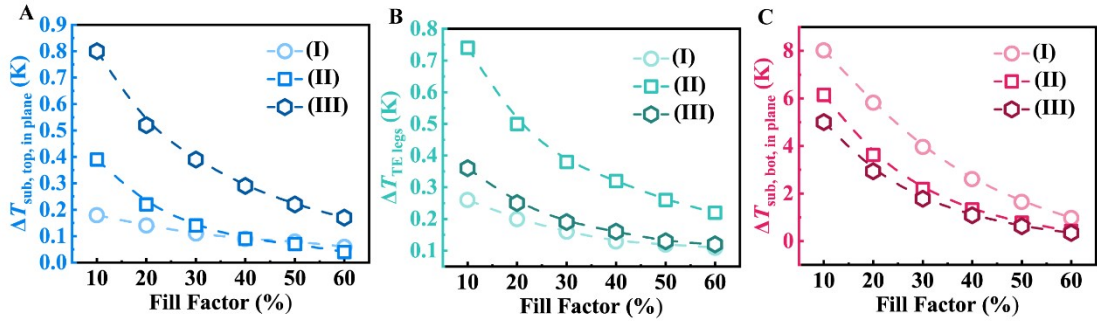

**Figure S5.** Temperature distribution of bottom substrate, thermoelectric legs and top substrate in the w-TEG with different fill factors (FFs): (A) FF = 10 %, (B) FF = 20 %, (C) FF = 30 %, (D) FF = 40%, (E) FF = 50%, (F) FF = 60%. Note: (I) the thermal conductivity of the substrate ( $\kappa_{\text{sub}}$ ) is  $0.1 \text{ W m}^{-1} \text{ K}^{-1}$ , and the thickness of substrate ( $d_{\text{sub}}$ ) is  $25 \mu\text{m}$ .(II) the thermal conductivity of the substrate ( $\kappa_{\text{sub}}$ ) is  $1 \text{ W m}^{-1} \text{ K}^{-1}$ , and the thickness of substrate ( $d_{\text{sub}}$ ) is  $25 \mu\text{m}$ . (III) the thermal conductivity of the substrate ( $\kappa_{\text{sub}}$ ) is  $0.1 \text{ W m}^{-1} \text{ K}^{-1}$ , and the thickness of substrate ( $d_{\text{sub}}$ ) is  $100 \mu\text{m}$ .

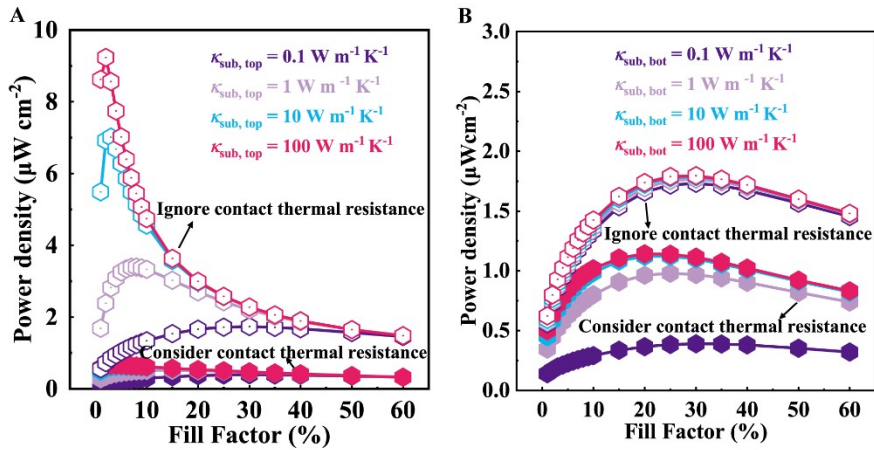

**Figure S6.** Comparing the effects on the relationship among FF,  $\kappa$  and power density when considering and ignoring the contact thermal resistance between the skin and the w-TEG interface. (A) When the thermal conductivity of the bottom substrate ( $\kappa_{\text{sub,bot}}$ ) is  $0.1 \text{ W m}^{-1} \text{ K}^{-1}$ , and the thermal conductivity of the top substrate ( $\kappa_{\text{sub,top}}$ ) is  $0.1$ ,  $1$ ,  $10$ , and  $100 \text{ W m}^{-1} \text{ K}^{-1}$ , respectively. (B) When  $\kappa_{\text{sub,top}} = 0.1 \text{ W m}^{-1} \text{ K}^{-1}$ , and  $\kappa_{\text{sub,bot}}$  is  $0.1$ ,  $1$ ,  $10$ , and  $100 \text{ W m}^{-1} \text{ K}^{-1}$ , respectively.

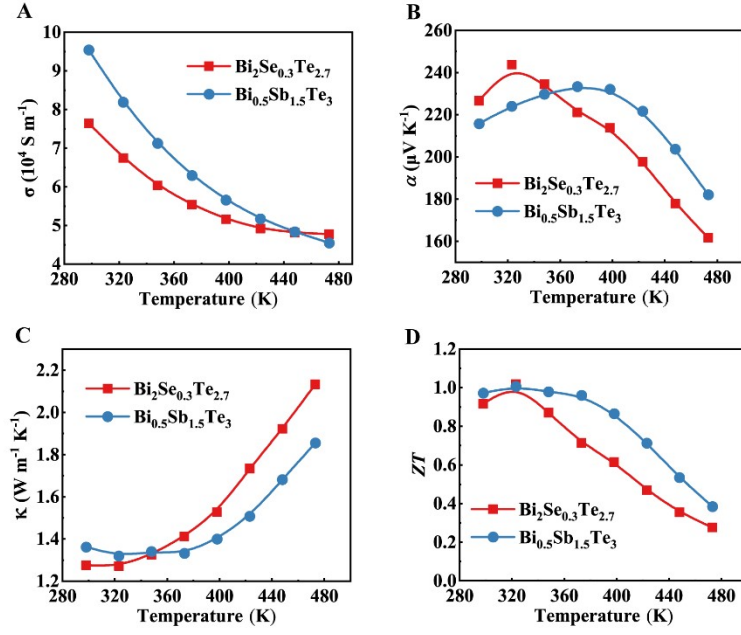

**Figure S7.** TE properties of the P/N-type TE legs material used for simulation and fabrication of the w-TEGs in this paper.

**Table S2** Weights of w-TEGs with PI substrate and laminated substrate with different fill factor.

| FF (%) | Weight(g)                |                                 |
|--------|--------------------------|---------------------------------|
|        | w-TEGs with PI substrate | w-TEGs with laminated substrate |
| 10     | 0.93                     | 1.01                            |
| 20     | 1.62                     | 1.71                            |
| 30     | 2.50                     | 2.59                            |
| 40     | 3.05                     | 3.17                            |

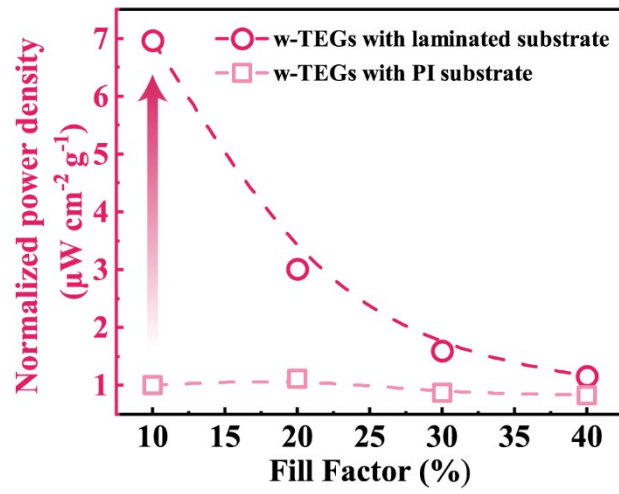

**Figure S8.** Normalized power density for w-TEGs with PI substrate and laminated substrate with different fill factor.

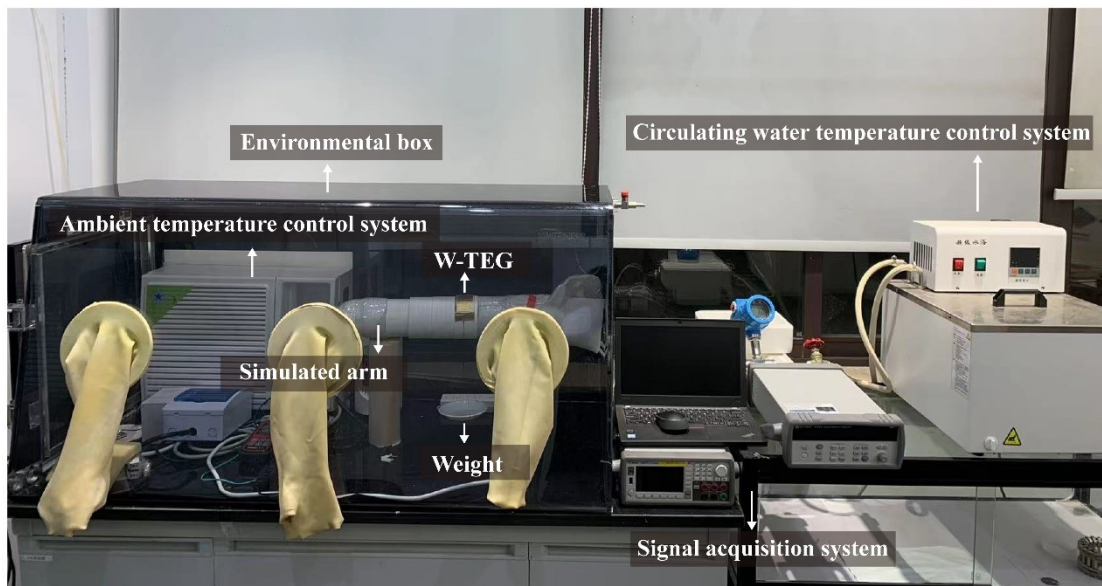

**Figure S9.** Simulation arm test system for W-TEG power generation performance characterization.

## Reference

- 1 A. Zhang, G. Li, B. Wang and J. Wang, *J. Electron. Mater.*, 2021, **50**, 1514–1526.
- 2 A. Bhowmik, R. Repaka and S. C. Mishra, *Numer. Heat Transf. A-Appl.*, 2015, **67**, 313–329.
- 3 Y. Li, J. Zhang, Y. Xing and J. Song, *AIP Adv.*, 2018, **8**, 055102.
- 4 S. Zhu, Y. Peng, J. Gao, L. Miao, H. Lai, C. Liu, J. Zhang, Y. Zhang, S. Zhou, K. Koumoto and T. Zhu, *ACS Appl. Mater. Interfaces*, 2021, acsami.1c20367.
- 5 Y. Wang, Z. Zhou, J. Zhou, L. Shao, Y. Wang and Y. Deng, *Adv. Energy Mater.*, 2021, 2102835.
- 6 D. Wijethunge, D. Kim and W. Kim, *J. Phys. D: Appl. Phys.*, 2018, **51**, 055401.
- 7 F. Xu, T. J. Lu and K. A. Seffen, *J. Mech. Phys. Solids*, 2008, **56**, 1852–1884.
- 8 Y. Cui, Y. Li, Y. Xing, T. Yang and J. Song, *Micromachines*, 2016, **7**, 210.
